# Supplementary material
Source: publisher figshare collection journal article supplement (https://acs.figshare.com/ndownloader/files/3814573)
Supplement: Supplementary file 1 [file 3814573]

# Supporting Information I

## Synthesis of Polysubstituted Quinolines *via* Transition-Metal-Free Oxidative Cycloisomerization of *o*-Cinnamylanilines

Mohammad Rehan, Gurupada Hazra and Prasanta Ghorai\*

\*Department of Chemistry, Indian Institute of Science Education and Research Bhopal, Bhauri, Bhopal-462066, India. E-mail: [pghorai@iiserb.ac.in](mailto:pghorai@iiserb.ac.in)

| Contents:                                                                            | Page: |
|--------------------------------------------------------------------------------------|-------|
| I Experimental Details and Compound Characterization Data                            | 2-23  |
| 1. General information's                                                             | 2     |
| 2. Preparation of starting materials                                                 | 3-7   |
| 2.1. Preparation of <i>o</i> -cinnamylanilines substrates                            | 3     |
| 2.2. Preparation of <b>1d</b>                                                        | 4-5   |
| 2.3. Preparation of <b>1ab</b>                                                       | 6-7   |
| 3. Optimization of the reaction conditions                                           | 7-8   |
| 4. Typical procedure for the Transition-Metal-Free cyclization                       | 8-9   |
| 4.1. General procedure for the Transition-Metal-Free Oxidative<br>Cycloisomerization | 8     |
| 4.2. General procedure for one-pot protocol                                          | 8     |
| 4.3. Preparation of <b>1ac</b>                                                       | 9     |
| 5. Characterization of quinoline products                                            | 9-23  |
| 6. References                                                                        | 23    |

## **I. Experimental Details and Compound Characterization Data**

### **1. General information**

All reagents and solvents were used as supplied commercially. Analytical thin-layer chromatography (TLC) was performed on 0.2 mm coated Science silica gel (EM 60-F254) plates purchased from Merck, Germany. Visualization was accomplished with UV light (254 nm) and exposure to either ethanolic phosphomolybdic acid (PMA), anisaldehyde or  $\text{KMnO}_4$ ,  $\text{CeSO}_4$  + ammonium phosphomolybdate + 10 %  $\text{H}_2\text{SO}_4$ , ninhydrine solution followed by heating. Melting points are uncorrected.  $^1\text{H}$  NMR spectra were acquired on a 400 MHz spectrometer and chemical shifts are reported relative to the residual solvent peak.  $^{13}\text{C}$  NMR spectra were acquired on a 100 MHz spectrometer and chemical shifts are reported in ppm relative to the residual solvent peak. Unless noted, NMR spectra were acquired in  $\text{CDCl}_3$ ; individual peaks are reported as: multiplicity, integration, coupling constant in Hz. All IR spectra were obtained as neat films with a Perkin-Elmer Model 2000 FT-IR and selected absorbances are reported in  $\text{cm}^{-1}$ . Low resolution (LR) and High-resolution (HR) mass spectrometry data were acquired by the Central Instrumentation Facility, Indian Institute of Science Education and Research Bhopal on a Bruker Daltonics MicroTOF-Q-II (quadrupole) Mass Spectrometer using  $\text{CH}_3\text{CN}/\text{H}_2\text{O}$  as solvent.

## 2. Preparation of starting materials

### 2.1 Preparation of *o*-cinnamylanilines:

**General procedure A:** Following a reported procedure,<sup>1,2</sup> to a stirred solution of alcohol (0.5 mmol) and aniline (0.6 mmol) in CH<sub>3</sub>CN (2.0 mL), taken in a round-bottomed flask was added Re<sub>2</sub>O<sub>7</sub> (1.5 or 5 mol %) and refluxed until the complete consumption of starting materials was observed (TLC). Then the reaction mixture was extracted with brine solution (2 mL), and EtOAc (3 × 10 mL). The combined organic layer was dried over anhydrous MgSO<sub>4</sub> and the solvent removed under vacuum. Then the crude residue was purified by flash column chromatography (EtOAc/n-Hexane) on silica gel.

#### 2.1.1 (*E*)-4-Methyl-2-(4-phenylbut-3-en-2-yl)aniline (**1a**):

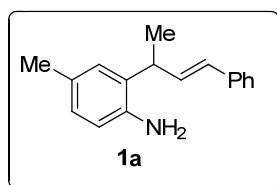

Yield: 93 mg, 78%;  $R_f$  = 0.34 (10:90 = EtOAc/n-Hexane); Light brown liquid ; **FT-IR (neat)**: 3426, 3359, 3015, 1629, 1512, 1425, 1278, 976, 871, 763, 678 cm<sup>-1</sup>; **<sup>1</sup>H NMR (400 MHz, CDCl<sub>3</sub>)**:  $\delta$  7.37 – 7.35 (2H), 7.29 (m, 2H), 7.22 – 7.19 (1H), 6.98 (s, 1H), 6.89 (dd,  $J$  = 8.0, 4.0 Hz, 1H), 6.60 (d,  $J$  = 8.0 Hz, 1H), 6.45 (d,  $J$  = 16 Hz, 1H), 6.34 (dd,  $J$  = 16.0, 4.0 Hz, 1H), 3.69 – 3.61 (m, 1H), 3.34 (bs, 2H), 2.28 (s, 3H), 1.49 (d,  $J$  = 8.0 Hz, 3H); **<sup>13</sup>C NMR (100 MHz, CDCl<sub>3</sub>)**:  $\delta$  141.6, 137.2, 134.2, 129.3, 128.9, 128.5, 128.3, 127.76, 127.73, 127.2, 126.1, 116.5, 37.5, 20.7, 19.3; **HR-MS (ESI,  $m/z$ )**:  $[M+H]^+$  calculated for C<sub>17</sub>H<sub>20</sub>N: 238.1596; found: 238.1584.

#### 2.1.2 2-Cinnamyl-4-methylaniline (**1b**):

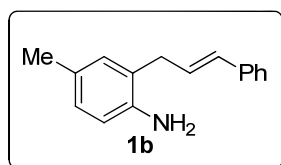

Yield: 85 mg, 76%;  $R_f$  = 0.31 (10:90 = EtOAc/n-Hexane); Yellow liquid; **FT-IR (neat)**: 3458, 3372, 3017, 2876, 1616, 1603, 1484, 1426, 1393, 1285, 1235, 1151, 968, 836, 762 cm<sup>-1</sup>; **<sup>1</sup>H NMR (400 MHz, CDCl<sub>3</sub>)**:  $\delta$ , 7.36 – 7.34 (2H), 7.31 – 7.27 (2H), 7.22 (m, 1H), 6.91 (m, 2H), 6.62 (d,  $J$  = 8.0 Hz, 1H), 6.46 (d,  $J$  = 16.0 Hz, 1H), 6.34 (m, 1H), 3.57 (s, 2H), 3.44

(d,  $J = 6.0$  Hz, 2H), 2.26 (s, 3H);  $^{13}\text{C}$  NMR (100 MHz,  $\text{CDCl}_3$ ):  $\delta$ , 142.3, 137.2, 131.1, 130.8, 128.5, 128.2, 128.1, 127.9, 127.2, 126.2, 124.3, 116.1, 35.6, 20.5; **HR-MS (ESI,  $m/z$ ):**  $[\text{M}+\text{H}]^+$  calculated for  $\text{C}_{16}\text{H}_{18}\text{N}$ : 224.1439; found: 224.1435.

### 2.1.3 4-Methyl-2-((2E,4E)-5-phenylpenta-2,4-dien-1-yl)aniline (**1c**):

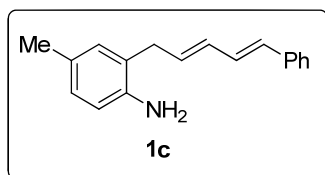

Yield: 84 mg, 67%;  $R_f = 0.27$  (10:90 = EtOAc/n-Hexane); Yellow liquid ; **FT-IR (neat):** 3473, 3379, 3056, 3022, 2919, 1946, 1613, 1574, 1502, 1492, 1438, 1421, 1393, 1309, 1258, 1152, 1124, 1036, 1014, 965, 863, 814, 764  $\text{cm}^{-1}$ ;  $^1\text{H}$  NMR (400 MHz,  $\text{CDCl}_3$ ):  $\delta$ , 7.38 – 7.36 (2H), 7.32 – 7.28 (m, 2H), 7.22 (m, 1H), 6.90 (m, 2H), 6.79 (dd,  $J = 12.0, 4.0$  Hz, 1H), 6.62 (d,  $J = 8.0$  Hz, 1H), 6.47 (d,  $J = 16.0$  Hz, 1H), 6.26 (dd,  $J = 12.0, 4.0$  Hz, 1H), 5.98 – 5.91 (m, 1H), 3.54 (bs, 2H), 3.38 (d,  $J = 8.0$  Hz, 2H), 2.26 (s, 3H);  $^{13}\text{C}$  NMR (100 MHz,  $\text{CDCl}_3$ ):  $\delta$ , 142.2, 137.4, 132.2, 131.7, 131.2, 130.8, 128.7, 128.6, 128.2, 128.1, 127.3, 126.2, 124.3, 116.1, 35.4, 20.5; **HR-MS (ESI,  $m/z$ ):**  $[\text{M}+\text{H}]^+$  calculated for  $\text{C}_{18}\text{H}_{20}\text{N}$ : 250.1596; found: 250.1578.

## 2.2. Preparation of **1d**:

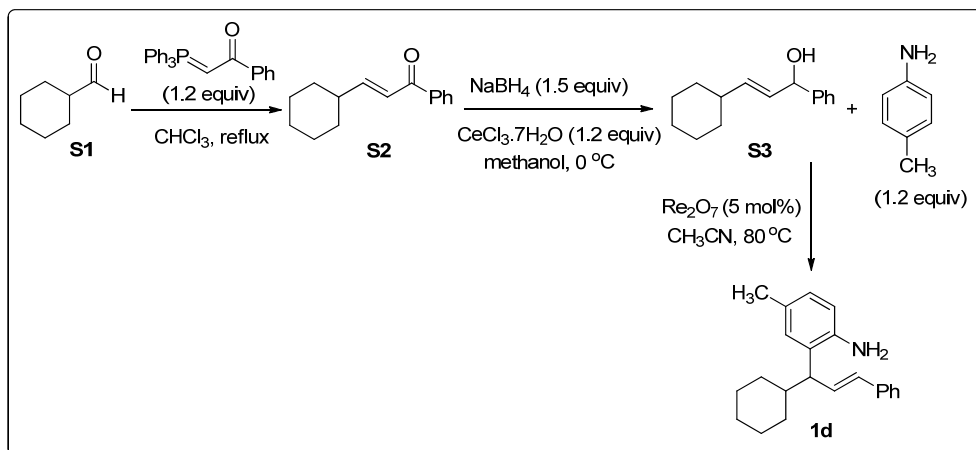

**General procedure B:** Following a modified procedure,<sup>3</sup> a 25 mL round bottomed flask was charged with cyclohexanecarbaldehyde (**S1**) (0.500 g, 4.46 mmol), (benzoylmethylene)triphenylphosphorane (2.03 g, 5.35 mmol), and 20 mL  $\text{CHCl}_3$  and

refluxed overnight. Then the reaction mixture was cooled to ambient temperature and concentrated under reduced pressure to which n-hexane was added and stirred vigorously until a white precipitate formed. Then the reaction mixture was filtered using a sintered funnel and further washed with CH<sub>2</sub>Cl<sub>2</sub> (10 mL). The obtained filtrate was then extracted with brine, dried over anhydrous MgSO<sub>4</sub> and the solvent removed under reduced pressure. The resulting crude residue was purified by flash column chromatography (EtOAc/n-Hexane) on silica gel to provide **S2** (0.700 g, 73 % yield) as a colourless oil.

**General procedure C:** Following a reported procedure,<sup>4</sup> to a stirred solution of CeCl<sub>3</sub>·7H<sub>2</sub>O (0.671 g, 1.8 mmol) and **S2** (0.321 g, 1.5 mmol) in MeOH (10 mL) at 0 °C added sodium borohydride (86 mg, 2.25 mmol) portion wise and the reaction mixture was further stirred for 15 min at rt. Then the reaction mixture was adjusted to pH 7 using a 10% HCl solution and extracted three times with Et<sub>2</sub>O. The combined organic layers washed with brine followed by drying over anhydrous MgSO<sub>4</sub>. Then the solvent was removed under reduced pressure and the crude residue was purified by flash column chromatography (EtOAc/n-Hexane) on silica gel to provide **S3** (0.303 g, 93 %) as a colourless liquid.

**1d** was synthesized following the above mentioned general procedure **A**.

### 2.2.1 (*E*)-2-(1-Cyclohexyl-3-phenylallyl)-4-methylaniline (**1d**):

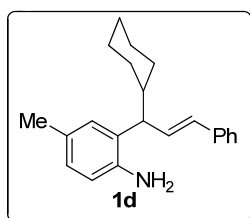

Yield: 96 mg, 63%; R<sub>f</sub> = 0.32 (10:90 = EtOAc/n-Hexane); brown liquid ; **FT-IR (neat):** 3436, 3356, 2910, 2949, 2354, 2301, 1612, 1461, 1289, 1284, 1107, 974, 815, 756, 685 cm<sup>-1</sup>; **<sup>1</sup>H NMR (400 MHz, CDCl<sub>3</sub>):** δ, 7.34 – 7.32 (2H), 7.28 – 7.24 (m, 2H), 7.21– 7.15 (m, 1H), 6.94 (s, 1H), 6.82 (d, *J* = 8.0 Hz, 1H), 6.60 (d, *J* = 8.0 Hz, 1H), 6.39 (d, *J* = 12.0 Hz, 1H), 6.29 (dd, *J* = 16.0, 8.0 Hz, 1H), 3.50 (bs, 2H), 3.14 (t, *J* = 8.0 Hz, 1H), 2.26 (s, 3H), 1.99 (d, *J* = 16.0 Hz, 1H), 1.77 – 1.74 (2H), 1.66 – 1.62 (3H), 1.29 – 1.27 (2H), 1.06 (m, 1H), 1.02 (dd, *J* = 11.7, 3.0 Hz, 1H), 0.90 – 0.88 (1H); **<sup>13</sup>C NMR (100 MHz, CDCl<sub>3</sub>):** δ, 141.7, 137.4, 132.2, 130.2, 128.5, 128.4, 128.3, 128.3, 127.2, 127.0, 126.2, 116.8, 50.2, 41.1, 31.8, 31.6,

26.6, 26.5, 26.4, 20.8; **HR-MS (ESI,  $m/z$ ):**  $[M+H]^+$  calculated for  $C_{22}H_{28}N$ : 306.2222; found: 306.2203.

### 2.3. Preparation of **1ab**:

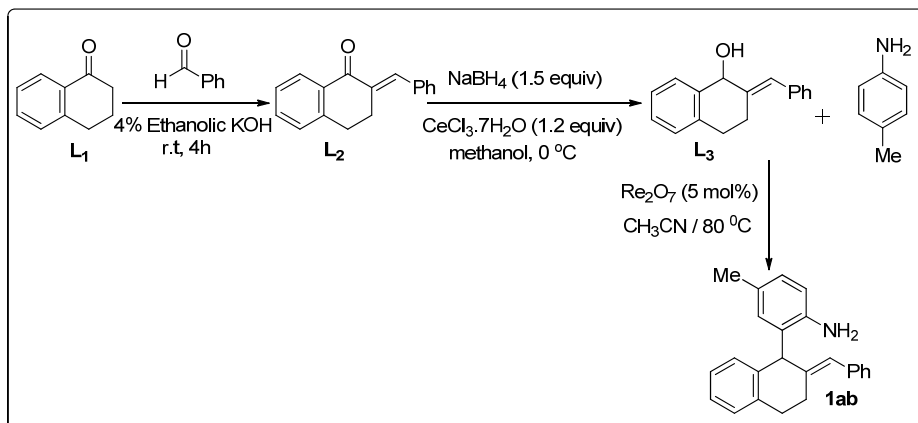

**1ab** was synthesized using following procedure.

**General procedure D:** Following a modified procedure,<sup>5</sup> a 25 mL round bottomed flask was charged with 3,4-dihydronaphthalen-1(2H)-one (**L1**) (0.500 g, 3.42 mmol), benzaldehyde (0.363 g, 3.42 mmol), and 4 % ethanol in KOH added dropwise in the flask and allowed to stirred at room temperature for 4 hr. After the completed of reaction a white precipitate was formed. The solids were filtered through the Buckner funnel and washed with 10 mL cold ethanol and kept at high vacuum pump for dry. The solvent was removed under reduced pressure and the crude residue was purified by flash column chromatography (EtOAc/n-Hexane) on silica gel to provide **L2** (0.671 g, 84 % yield) as a white solid.

**General procedure E:** Following a reported procedure,<sup>4</sup>  $CeCl_3 \cdot 7H_2O$  (0.671 g, 1.8 mmol) was taken in MeOH (10 mL) in a 25 mL round bottomed flask. **L2** (0.351 g, 1.5 mmol) was added under stirring at 0 °C. Sodium borohydride (86 mg, 2.25 mmol) was added portion wise, and then the reaction mixture was stirred for another 15 min at rt. Then the reaction mixture was adjusted to pH 7 using a 10 % HCl solution and extracted three times with  $Et_2O$ . Combined organic layers were washed with brine followed by drying over anhydrous  $MgSO_4$ . The solvent was removed under reduced pressure and the crude residue was purified by flash column chromatography (EtOAc/n-Hexane) on silica gel to provide **L3** (0.310 g, 87 %) as a light brown liquid.

**1ab** was synthesized using the above mentioned general procedure **A**.

### 2.3.1 (*E*)-2-(2-Benzylidene-1,2,3,4-tetrahydronaphthalen-1-yl)-4-methylaniline (**1ab**):

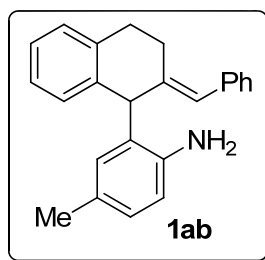

Yield: 106 mg, 65%;  $R_f = 0.33$  (05:95 = EtOAc/n-Hexane); light brown liquid ; **FT-IR (neat)**: 3413, 3056, 2911, 2801, 1588, 1563, 1548, 1490, 1449, 1409, 1358, 1195, 1028, 940, 883, 861  $\text{cm}^{-1}$ ;  **$^1\text{H}$  NMR (400 MHz,  $\text{CDCl}_3$ )**:  $\delta$ , 7.38 – 7.34 (2H), 7.31 – 7.26 (3H), 7.14 – 7.13 (3H), 6.94 (m, 2H), 6.82 (s, 1H), 6.65 (d,  $J = 8.0$  Hz, 1H), 6.01 (s, 1H), 4.86 (s, 1H), 3.45 (bs, 2H), 2.91 – 2.86 (m, 2H), 2.37 – 2.31 (2H), 2.23 (s, 3H);  **$^{13}\text{C}$  NMR (100 MHz,  $\text{CDCl}_3$ )**:  $\delta$ , 142.6, 142.2, 140.9, 134.7, 134.5, 130.1, 129.7, 128.5, 128.09, 128.06, 127.5, 127.3, 126.8, 126.8, 126.5, 126.2, 125.7, 116.6, 53.6, 28.9, 28.3, 20.8; **HR-MS (ESI,  $m/z$ )**:  $[\text{M}+\text{H}]^+$  calculated for  $\text{C}_{24}\text{H}_{24}\text{N}$ : 326.1909; found: 326.1912.

## 3. Optimization of the reaction conditions

**Table 1.** Optimization of the reaction conditions<sup>a</sup>

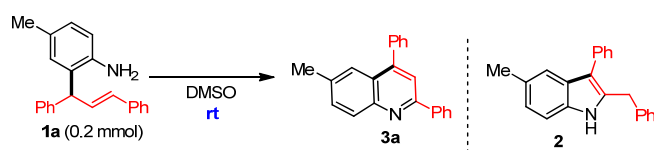

| entry | Base<br>(0.5 equiv)     | Ligand | Solvent     | <b>3a</b> (%) <sup>b</sup> |
|-------|-------------------------|--------|-------------|----------------------------|
| 1     | Carbonates <sup>c</sup> | -      | DMSO        | -                          |
| 2     | LiOH                    | -      | DMSO        | -                          |
| 3     | NaOH                    | -      | DMSO        | 22                         |
| 4     | KOH                     | -      | DMSO        | 25                         |
| 5     | NaH                     | -      | DMSO        | 58                         |
| 6     | KO <sup>t</sup> Bu      | -      | DMSO        | 83                         |
| 7     | KO <sup>t</sup> Bu      | -      | DMF         | 53                         |
| 8     | KO <sup>t</sup> Bu      | -      | 1,4-dioxane | -                          |

|    |                    |    |                                 |    |
|----|--------------------|----|---------------------------------|----|
| 9  | KO <sup>t</sup> Bu | -  | Et <sub>2</sub> O               | 16 |
| 10 | KO <sup>t</sup> Bu | -  | THF                             | 12 |
| 11 | KO <sup>t</sup> Bu | -  | MeOH                            | -  |
| 12 | KO <sup>t</sup> Bu | -  | EtOAc                           | 12 |
| 13 | KO <sup>t</sup> Bu | -  | CH <sub>2</sub> Cl <sub>2</sub> | -  |
| 14 | KO <sup>t</sup> Bu | L1 | DMSO                            | 79 |
| 15 | KO <sup>t</sup> Bu | L2 | DMSO                            | 80 |
| 16 | KO <sup>t</sup> Bu | L3 | DMSO                            | 77 |
| 17 | KO <sup>t</sup> Bu | L4 | DMSO                            | 78 |
| 18 | KO <sup>t</sup> Bu | L5 | DMSO                            | 77 |
| 19 | KO <sup>t</sup> Bu | L6 | DMSO                            | 75 |

<sup>a</sup> The reaction was carried out with **1a** (0.2 mmol), K<sup>t</sup>OBu (0.5 equiv), 4 h, 1 mL solvent, under argon atmosphere. <sup>b</sup> The conversions are isolated yields. <sup>c</sup> Carbonates such as Na<sub>2</sub>CO<sub>3</sub>, K<sub>2</sub>CO<sub>3</sub>, Cs<sub>2</sub>CO<sub>3</sub> are used.

Ligands:

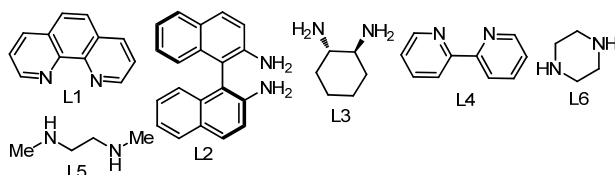

## 4. Transition-Metal-Free cyclization

**4.1 General procedure for the oxidative cycloisomerization:** *o*-Cinnamylaniline **1** (0.20 mmol) and K<sup>t</sup>OBu (0.5-1.5 equiv) in DMSO (0.5 mL) was taken in a round bottomed flask (2 mL). The flask containing the reaction mixture was purged with argon for 5 min and allowed to stir at room temperature until the complete consumption of starting material observed by TLC. The reaction mixture was diluted with NaHCO<sub>3</sub> (5 mL) followed by washing with ethyl acetate (3 x 10 mL). The organic extract was dried over anhydrous MgSO<sub>4</sub>. The solvents were removed under reduced pressure to provide the crude product **3** which was purified by flash column chromatography on silica gel using n-hexane/ethyl acetate as eluent.

**4.2 General procedure for one-pot protocol:** To a stirred solution of alcohol (0.2 mmol) and aniline (0.24 mmol) in CH<sub>3</sub>CN (2.0 mL), taken in a round bottomed flask attached to a refluxed condenser, Re<sub>2</sub>O<sub>7</sub> (5 mol %) was added. The reaction was stirred at 80 °C. After consumption of starting material (followed by TLC analysis), the solvent was removed under reduced pressure. To this reaction mixture, DMSO (0.5 mL) was added and purged with argon for 5 min, K<sup>t</sup>OBu (1.5 equiv) was added. The reaction mixture was allowed to stir at



room temperature until the complete consumption of starting material observed by TLC. The reaction mixture was diluted with NaHCO<sub>3</sub> (5 mL) followed by washing with ethyl acetate (3 x 10 mL). The organic extract was dried over anhydrous MgSO<sub>4</sub>. The solvents were removed under reduced pressure to provide the crude product **4** which was purified by flash column chromatography on silica-gel using n-hexane/ethyl acetate as eluent.

### 4.3 Preparation of (1ac):<sup>6</sup>

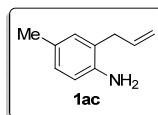

**1ac** were synthesized using the previously reported method and the characterization data for this compound **1ac** matched with the previously reported data.<sup>6</sup>

## 5. Characterization of Quinolines

### 5.1 6-Methyl-2,4-diphenylquinoline (3a; Scheme 3)<sup>7</sup>

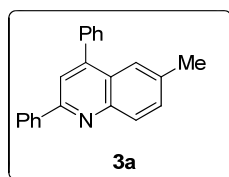

The title compound was prepared using the general procedure for the K<sup>t</sup>OBu catalyzed oxidative cycloisomerization.

Yield: 49 mg, 83%; R<sub>f</sub> = 0.34 (05:95 = EtOAc/n-Hexane); Yellow solid; **mp** 120-123°C; **FT-IR (neat)**: 3413, 3056, 2911, 2801, 1588, 1563, 1548, 1490, 1449, 1409, 1358, 1195, 1028, 940, 883, 861 cm<sup>-1</sup>; **<sup>1</sup>H NMR (400 MHz, CDCl<sub>3</sub>)**: δ, 8.21 (2H), 8.17 (d, *J* = 8 Hz, 1H), 7.81 (s, 1H), 7.68 (s, 1H), 7.61 (d, *J* = 1.9 Hz, 2H), 7.59 (d, *J* = 4.6 Hz, 3H), 7.57-7.53 (m, 3H), 7.50-7.48 (d, *J* = 7.2 Hz, 1H), 2.51 (s, 3H); **<sup>13</sup>C NMR (100 MHz, CDCl<sub>3</sub>)**: δ, 156.0, 148.4, 147.4, 139.7, 138.6, 136.3, 131.7, 129.8, 129.5, 129.1, 128.8, 128.5, 128.3, 127.5, 125.7, 124.4, 119.4, 21.8; **LR-MS (ESI, *m/z*)**: [M+H]<sup>+</sup> calculated for C<sub>22</sub>H<sub>18</sub>N: 296.1; found: 296.2.

### 5.2 6,7-Dimethyl-2,4-diphenylquinoline (3b; Scheme 3)

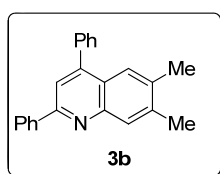

The title compound was prepared using the general procedure for the K<sup>t</sup>OBu catalyzed oxidative cycloisomerization.

Yield: 48.9 mg, 79%; R<sub>f</sub> = 0.48 (20:80 = EtOAc/n-Hexane); Brown solid; **mp** 150-152 °C  
**FT-IR (neat)**: 3410, 3050, 2901, 2779, 1636, 1541, 1449, 1389, 1358, 1224, 1134, 1027, 936, 880, 833 cm<sup>-1</sup>; **<sup>1</sup>H NMR (400 MHz, CDCl<sub>3</sub>)**: δ, 8.17 (d, *J* = 7.2 Hz, 2H), 8.01 (s, 1H), 7.72 (s, 1H), 7.62 (s, 1H), 7.55 (d, *J* = 4.5 Hz, 4H), 7.51 (m, 3H), 7.43 (m, 1H), 2.49 (s, 3H), 2.38 (s, 3H); **<sup>13</sup>C NMR (100 MHz, CDCl<sub>3</sub>)**: δ, 156.0, 148.1, 148.0, 139.9, 139.7, 138.8, 136.3, 129.5, 129.0, 128.7, 128.5, 128.2, 127.9, 127.4, 124.7, 124.2, 118.6, 20.3, 20.2; **LR-MS (ESI, *m/z*)**: [M+H]<sup>+</sup> calculated for C<sub>23</sub>H<sub>20</sub>N: 310.15; found: 310.2.

### 5.3 6,7-Dimethoxy-2,4-diphenylquinoline (3c; Scheme 3):

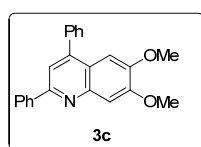

The title compound was prepared using the general procedure for the K<sup>t</sup>OBu catalyzed oxidative cycloisomerization.

Yield: 58.7 mg, 86%; R<sub>f</sub> = 0.25 (05:95 = EtOAc/n-Hexane); White solid; **mp** 160-162°C;  
**FT-IR (neat)**: 3397, 3015, 2858, 2099, 1849, 1637, 1452, 1360, 1261, 1210, 1153, 905, 761 cm<sup>-1</sup>; **<sup>1</sup>H NMR (400 MHz, CDCl<sub>3</sub>)**: δ, 8.20 (d, *J* = 8 Hz, 2H), 7.82 (s, 1H), 7.59 (4H), 7.52 (m, 3H), 7.44 (d, *J* = 4 Hz, 1H), 6.78 (s, 2H), 4.12 (s, 3H), 3.80 (s, 3H); **<sup>13</sup>C NMR (100 MHz, CDCl<sub>3</sub>)**: δ, 158.1, 156.8, 153.4, 147.8, 139.8, 139.1, 137.4, 129.3, 128.8, 128.7, 128.6, 128.3, 127.4, 127.4, 120.4, 101.2, 95.3, 56.3, 55.4; **HR-MS (ESI, *m/z*)**: [M+H]<sup>+</sup> calculated for C<sub>23</sub>H<sub>20</sub>NO<sub>2</sub>: 342.1494; found: 342.1498.

### 5.4 6,8-Dimethoxy-2,4-diphenylquinoline (3d; Scheme 3)

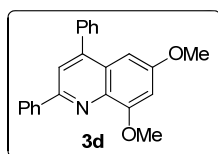

The title compound was prepared using the general procedure for the K<sup>t</sup>OBu catalyzed oxidative cycloisomerization.

Yield: 57.5 mg, 84%; R<sub>f</sub> = 0.31 (05:95 = EtOAc/n-Hexane); White solid; **mp** 145-148 °C;  
**FT-IR (neat)**: 3389, 3068, 2962, 2916, 1622, 1537, 1499, 1406, 1357, 1328, 1247, 1142, 1093, 939, 752 cm<sup>-1</sup>; **<sup>1</sup>H NMR (400 MHz, CDCl<sub>3</sub>)**: δ, 8.13 (d, *J* = 8 Hz, 2H), 7.66 (s, 1H), 7.57 – 7.54 (5H), 7.51-7.47 (m, 3H), 7.42 (t, *J* = 4 Hz, 1H), 7.16 (s, 1H), 4.06 (s, 3H), 3.84 (s,

3H); **<sup>13</sup>C NMR (100 MHz, CDCl<sub>3</sub>):** δ, 155.1, 152.4, 149.7, 147.4, 146.0, 139.9, 138.9, 129.3, 128.9, 128.8, 128.7, 128.3, 127.3, 121.1, 117.9, 108.7, 103.3, 56.2, 55.9; **HR-MS (ESI, m/z):** [M+H]<sup>+</sup> calculated for C<sub>23</sub>H<sub>20</sub>NO<sub>2</sub>: 342.1494; found: 342.1499.

### 5.5 2,4-Diphenyl-7,8-dihydro-6H-cyclopenta[g]quinoline (3e; Scheme 3)

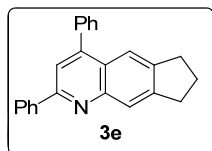

The title compound was prepared using the general procedure for the K<sup>t</sup>OBu catalyzed oxidative cycloisomerization.

Yield: 50.8 mg, 79%; R<sub>f</sub> = 0.35 (10:90 = EtOAc/n-Hexane); Yellow liquid; **FT-IR (neat):** 3417, 3061, 3421, 3059, 2988, 2845, 2779, 1633, 1588, 1517, 1480, 1389, 1360, 1265, 1024, 936, 878, 830 cm<sup>-1</sup>; **<sup>1</sup>H NMR (400 MHz, CDCl<sub>3</sub>):** δ, 8.21 (d, *J* = 8.0 Hz, 2H), 8.09 (s, 1H), 7.76 (s, 1H), 7.71 (s, 1H), 7.59 – 7.56 (m, 4H), 7.55-7.53 (3H), 7.79-7.45 (m, 1H), 3.17 (t, *J* = 4.0 Hz, 2H), 3.04 (t, *J* = 4.0 Hz, 2H), 2.19 (q, *J* = 8.0 Hz, 2H). **<sup>13</sup>C NMR (100 MHz, CDCl<sub>3</sub>):** δ, 155.7, 148.6, 147.6, 144.2, 139.9, 139.1, 129.6, 129.0, 128.8, 128.5, 128.3, 128.2, 127.5, 124.8, 124.4, 119.5, 118.5, 32.8, 32.7, 26.2; **GC-MS (EI, m/z):** [M]<sup>+</sup> calculated for C<sub>24</sub>H<sub>19</sub>N: 321.1517; found: 321.1521.

### 5.6 6,8-Diphenyl-[1,3]dioxolo[4,5-g]quinoline (3f; Scheme 3)

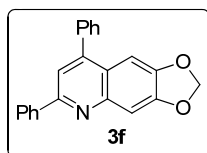

The title compound was prepared using the general procedure for the K<sup>t</sup>OBu catalyzed oxidative cycloisomerization.

Yield: 55.4 mg, 85%; R<sub>f</sub> = 0.30 (10:90 = EtOAc/n-Hexane); White solid; **mp** 70-72°C; **FT-IR (neat):** 3385, 2954, 2706, 1653, 1425, 1378, 1286, 1123, 1042, 854, 763 cm<sup>-1</sup>; **<sup>1</sup>H NMR (400 MHz, CDCl<sub>3</sub>):** δ, 8.13 (d, *J* = 4.0 Hz, 2H), 7.66 (s, 1H), 7.53 – 7.50 (m, 5H), 7.49 (d, *J* = 8.0 Hz, 3H), 7.42 (m, 1H), 7.14 (s, 1H), 6.05 (s, 2H); **<sup>13</sup>C NMR (100 MHz, CDCl<sub>3</sub>):** δ, 154.9, 150.5, 148.1, 147.9, 147.2, 139.7, 138.9, 129.4, 128.9, 128.8, 128.6, 128.3, 127.3, 122.6, 117.8, 106.4, 101.7, 101.1; **GC-MS (EI, m/z):** [M+H]<sup>+</sup> calculated for C<sub>22</sub>H<sub>16</sub>NO<sub>2</sub>: 326.1181; found: 326.1178.

### 5.7 7,9-Diphenyl-2,3-dihydro-[1,4]dioxino[2,3-g]quinoline (3g; Scheme 3)

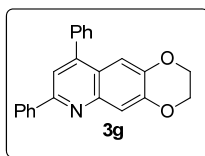

The title compound was prepared using the general procedure for the K<sup>t</sup>OBu catalyzed oxidative cycloisomerization.

Yield: 59 mg, 87%; R<sub>f</sub> = 0.42 (05:95 = EtOAc/n-Hexane); Yellow solid; **mp** 73-75°C; **FT-IR (neat)**: 3257, 3083, 2858, 2909, 2087, 1644, 1496, 1281, 1237, 1197, 1059, 875, 755 cm<sup>-1</sup>; **<sup>1</sup>H NMR (400 MHz, CDCl<sub>3</sub>)**: δ, 8.13 (d, *J* = 8.0 Hz, 2H), 7.66 (d, *J* = 12.0 Hz, 2H), 7.52 (d, *J* = 4.0 Hz, 4H), 7.49 – 7.47 (m, 3H), 7.44 – 7.40 (m, 1H), 7.30 (s, 1H), 4.36 (4H); **<sup>13</sup>C NMR (100 MHz, CDCl<sub>3</sub>)**: δ, 155.6, 147.6, 146.8, 145.5, 144.2, 139.9, 138.7, 129.4, 128.9, 128.7, 128.6, 128.3, 127.4, 121.8, 117.8, 114.8, 110.3, 64.4, 64.4; **HR-MS (ESI, *m/z*)**: [M+H]<sup>+</sup> calculated for C<sub>23</sub>H<sub>18</sub>NO<sub>2</sub>: 340.1338; found: 340.1330.

### 5.8 5,6,7-Trimethoxy-2,4-diphenylquinoline (3h; Scheme 3)

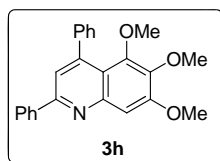

The title compound was prepared using the general procedure for the K<sup>t</sup>OBu catalyzed oxidative cycloisomerization.

Yield: 57.4 mg, 77%; R<sub>f</sub> = 0.31 (10:90 = EtOAc/n-Hexane); Brown solid; **mp** 100-102 °C; **FT-IR (neat)**: 3407, 2799, 2092, 1638, 1478, 1397, 1246, 1150, 1113, 1033, 991, 903, 758 cm<sup>-1</sup>; **<sup>1</sup>H NMR (400 MHz, CDCl<sub>3</sub>)**: δ, 8.11 (d, *J* = 8.0 Hz, 2H), 7.52 (s, 1H), 7.50 – 7.45 (m, 3H), 7.41 (6H), 4.04 (s, 3H), 3.92 (s, 3H), 3.29 (s, 3H); **<sup>13</sup>C NMR (100 MHz, CDCl<sub>3</sub>)**: δ, 155.8, 155.7, 148.7, 147.6, 147.2, 142.2, 142.2, 139.5, 129.2, 128.8, 128.4, 127.4, 127.1, 127.0, 119.8, 116.6, 105.5, 61.1, 60.6, 56.1; **HR-MS (ESI, *m/z*)**: [M+H]<sup>+</sup> calculated for C<sub>24</sub>H<sub>22</sub>NO<sub>3</sub>: 372.1600; found: 372.1603.

### 5.9 6-(Methylthio)-2,4-diphenylquinoline (3i; Scheme 3)

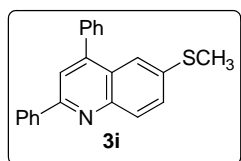

The title compound was prepared using the general procedure for the K<sup>t</sup>OBu catalyzed

oxidative cycloisomerization.

Yield: 58.4 mg, 89%;  $R_f$  = 0.35 (05:95 = EtOAc/n-Hexane); Yellow solid; **mp** 142-145 °C  
**FT-IR (neat):** 3412, 3068, 3030, 2361, 1603, 1470, 1386, 1293, 1064, 959, 870, 799, 703  $\text{cm}^{-1}$ ;  **$^1\text{H}$  NMR (400 MHz,  $\text{CDCl}_3$ ):**  $\delta$ , 8.17 (d,  $J$  = 8.0 Hz, 2H), 8.13 (d,  $J$  = 12.0 Hz, 1H), 7.79 (s, 1H), 7.67 (d,  $J$  = 2.0 Hz, 1H), 7.62 (dd,  $J$  = 8.0, 4.0, Hz, 1H), 7.55 (4H), 7.53 – 7.49 (m, 3H), 7.45 (m, 1H), 2.46 (s, 3H);  **$^{13}\text{C}$  NMR (100 MHz,  $\text{CDCl}_3$ ):**  $\delta$ , 156.1, 147.8, 147.1, 139.5, 138.3, 137.1, 130.4, 129.5, 129.3, 128.9, 128.8, 128.7, 128.5, 127.4, 126.2, 121.1, 119.9, 15.8; **HR-MS (ESI,  $m/z$ ):**  $[\text{M}+\text{H}]^+$  calculated for  $\text{C}_{22}\text{H}_{18}\text{NS}$ : 328.1160; found: 328.1165.

### 5.10 6-Nitro-2,4-diphenylquinoline (3j; Scheme 3)<sup>9</sup>

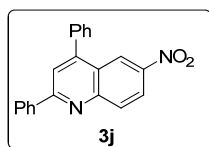

The title compound was prepared using the general procedure for the  $\text{K}^t\text{OBu}$  catalyzed oxidative cycloisomerization.

Yield: 53.2 mg, 81%;  $R_f$  = 0.32 (10:90 = EtOAc/n-Hexane); White solid; **mp** 197-200 °C ;  
**FT-IR (neat):** 3324, 2912, 2753, 2085, 1531, 1457, 1401, 1132, 1116, 1021, 986, 894, 824, 726  $\text{cm}^{-1}$ ;  **$^1\text{H}$  NMR (400 MHz,  $\text{CDCl}_3$ ):**  $\delta$ , 8.84 (d,  $J$  = 2.4 Hz, 1H), 8.47 (dd,  $J$  = 9.2, 2.5 Hz, 1H), 8.31 (d,  $J$  = 9.2 Hz, 1H), 8.23 (dd,  $J$  = 7.9, 1.5 Hz, 2H), 7.96 (s, 1H), 7.56 – 7.51 (8H);  **$^{13}\text{C}$  NMR (100 MHz,  $\text{CDCl}_3$ ):**  $\delta$ , 160.0, 151.3, 151.0, 145.4, 138.5, 136.9, 131.7, 130.4, 129.4, 129.3, 129.1, 129.1, 127.8, 124.8, 123.1, 122.9, 120.7; **LR-MS (ESI,  $m/z$ ):**  $[\text{M}+\text{H}]^+$  calculated for  $\text{C}_{21}\text{H}_{15}\text{N}_2\text{O}_2$ : 327.1; found: 327.2.

### 5.11 6-Fluoro-2,4-diphenylquinoline (3k; Scheme 3)

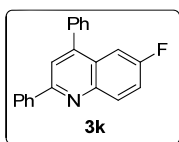

The title compound was prepared using the general procedure for the  $\text{K}^t\text{OBu}$  catalyzed oxidative cycloisomerization.

Yield: 46.7 mg, 78%;  $R_f$  = 0.35 (05:95 = EtOAc/n-Hexane); Light Yellow solid; **mp** 76-80 °C ; **FT-IR (neat):** 3365, 3045, 2875, 2023, 1867, 1642, 1509, 1426, 1369, 1215, 1023, 965, 809, 726  $\text{cm}^{-1}$ ;  **$^1\text{H}$  NMR (400 MHz,  $\text{CDCl}_3$ ):**  $\delta$ , 8.23 (dd,  $J$  = 12.0, 4.0 Hz, 1H), 8.17 (d,  $J$  = 4 Hz, 2H), 7.83 (s, 1H), 7.54 (7H), 7.50 (d,  $J$  = 2.4 Hz, 2H), 7.47 (m, 1H);  **$^{13}\text{C}$  NMR (100**

**MHz, CDCl<sub>3</sub>**):  $\delta$ , 161.8, 159.4, 156.3, 148.72 (d,  $J$  = 5.6 Hz), 145.9, 139.4, 137.9, 132.55 (d,  $J$  = 9.1 Hz), 129.4, 129.3, 128.85 (d,  $J$  = 9.0 Hz), 128.6, 127.4, 126.54 (d,  $J$  = 9.5 Hz), 119.70 (d,  $J$  = 25.7 Hz), 109.07 (d,  $J$  = 23.1 Hz); **LR-MS (ESI,  $m/z$ )**:  $[M+H]^+$  calculated for C<sub>21</sub>H<sub>15</sub>FN: 300.1; found: 300.2.

### 5.12 2,4-Diphenyl-6-(trifluoromethyl)quinoline (3l; Scheme 3):<sup>10</sup>

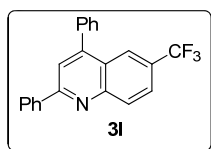

The title compound was prepared using the general procedure for the K<sup>t</sup>OBu catalyzed oxidative cycloisomerization.

Yield: 60 mg, 86%;  $R_f$  = 0.44 (05:95 = EtOAc/n-Hexane); White Solid; **mp** 148-150 °C ; **FT-IR (neat)**: 3410, 2790, 2083, 1636, 1452, 1307, 1156, 1107, 901, 833, 755 cm<sup>-1</sup>; **<sup>1</sup>H NMR (400 MHz, CDCl<sub>3</sub>)**:  $\delta$ , 8.33 (d,  $J$  = 8.0 Hz, 1H), 8.22 (d,  $J$  = 4.0 Hz, 1H), 8.20 (s, 2H), 7.91 – 7.88 (m, 2H), 7.56 (6H), 7.50 (m, 2H); **<sup>13</sup>C NMR (100 MHz, CDCl<sub>3</sub>)**:  $\delta$ , 158.8, 150.1, 149.8, 138.9, 137.4, 131.3, 129.9, 129.5, 128.9, 128.9, (128.5, 128.2, 127.8, 127.5) (q,  $J$  = 33 Hz, C), 127.7, (125.3, 125.2, 125.2, 125.2) (q,  $J$  = 3.1 Hz, CH), (128.2, 125.5, 122.8, 120.1) (q,  $J$  = 272 Hz, C), 124.9, (123.8, 123.7, 123.7, 123.6) (q,  $J$  = 4.5 Hz, CH), 120.4; **LR-MS (ESI,  $m/z$ )**:  $[M+H]^+$  calculated for C<sub>22</sub>H<sub>15</sub>F<sub>3</sub>N: 350.1; found: 350.2.

### 5.13 2,4-Diphenyl-6-(trifluoromethoxy)quinoline (3m; Scheme 3)

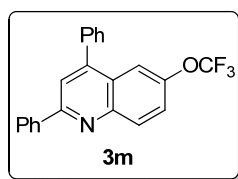

The title compound was prepared using the general procedure for the K<sup>t</sup>OBu catalyzed oxidative cycloisomerization.

Yield: 60 mg, 82%;  $R_f$  = 0.32 (05:95 = EtOAc/n-Hexane); White Solid; **mp** 130-132 °C; **FT-IR (neat)**: 3427, 3019, 2928, 2101, 1644, 1544, 1299, 1262, 1213, 1156, 877, 763 cm<sup>-1</sup>; **<sup>1</sup>H NMR (400 MHz, CDCl<sub>3</sub>)**:  $\delta$ , 8.27 (d,  $J$  = 8.0 Hz, 1H), 8.19 – 8.17 (m, 2H), 7.86 (s, 1H), 7.73 (d,  $J$  = 4.0 Hz, 1H), 7.61 – 7.57 (m, 2H), 7.56 – 7.53 (5H), 7.48 (m, 2H) ; **<sup>13</sup>C NMR (100 MHz, CDCl<sub>3</sub>)**:  $\delta$ , 157.4, 149.2, 147.1, 146.9, 139.2, 137.6, 132.2, 129.6, 129.4, 128.9, 128.9, 128.8, 127.6, 126.1, (126.9, 124.4, 121.8, 119.2) (q,  $J$  = 256 Hz, C), 123.5, 120.1, 116.4; **GC-MS (EI,  $m/z$ )**:  $[M]^+$  calculated for C<sub>22</sub>H<sub>14</sub>F<sub>3</sub>NO: 365.1027; found: 365.1027.

#### 5.14 6-Chloro-2,4-diphenylquinoline (3n; Scheme 3)<sup>8</sup>

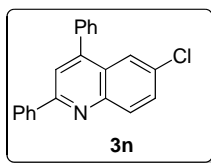

The title compound was prepared using the general procedure for the K<sup>t</sup>OBu catalyzed oxidative cycloisomerization.

Yield: 55 mg, 87%;  $R_f$  = 0.32 (20:80 = EtOAc/n-Hexane); White Solid; **mp** 92-95 °C; **FT-IR (neat)**: 3323, 2914, 2859, 2092, 1647, 1587, 1517, 1484, 1422, 1357, 1153, 1070, 1024, 936, 859, 886, 770  $\text{cm}^{-1}$ ; **<sup>1</sup>H NMR (400 MHz, CDCl<sub>3</sub>)**:  $\delta$ , 8.18 – 8.15 (m, 3H), 7.86 (d,  $J$  = 4.0 Hz, 1H), 7.83 (s, 1H), 7.65 (dd,  $J$  = 8.0, 4.0 Hz, 1H), 7.54 (6H), 7.47 (m, 2H); **<sup>13</sup>C NMR (100 MHz, CDCl<sub>3</sub>)**:  $\delta$ , 157.1, 148.5, 147.2, 139.2, 137.7, 132.2, 131.7, 130.4, 129.6, 129.4, 128.9, 128.8, 128.7, 127.5, 126.5, 124.5, 120.1; **LR-MS (ESI,  $m/z$ )**:  $[M+H]^+$  calculated for C<sub>21</sub>H<sub>15</sub>ClN: 316.1; found: 316.1.

#### 5.15 7-Chloro-6-fluoro-2,4-diphenylquinoline (3o; Scheme 3)

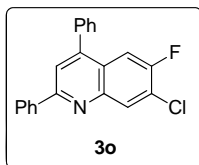

The title compound was prepared using the general procedure for the K<sup>t</sup>OBu catalyzed oxidative cycloisomerization.

Yield: 44.7 mg, 67%;  $R_f$  = 0.35 (05:95 = EtOAc/n-Hexane); Light yellow solid; **mp** 135-138 °C; **FT-IR (neat)**: 3423, 3059, 2925, 2854, 2363, 1706, 1603, 1495, 1453, 1374, 1289, 1158, 1072, 917, 755  $\text{cm}^{-1}$ ; **<sup>1</sup>H NMR (400 MHz, CDCl<sub>3</sub>)**:  $\delta$ , 8.84 (m, 1H), 8.47 (dd,  $J$  = 7.7, 1.7 Hz, 1H), 8.45 (s, 1H), 8.32 – 8.30 (2H), 8.24 (1H), 7.96 (7H); **<sup>13</sup>C NMR (100 MHz, CDCl<sub>3</sub>)**:  $\delta$ , 160.6 (d,  $J$  = 247.2 Hz), 156.3 (d,  $J$  = 2.7 Hz), 148.7 (d,  $J$  = 5.6 Hz), 145.9 (d,  $J$  = 0.4 Hz), 139.4, 137.9, 132.5 (d,  $J$  = 9.1 Hz), 129.4, 129.3, 128.9, 128.8, 128.6, 127.4, 126.5 (d,  $J$  = 9.5 Hz), 119.9, 119.7 (d,  $J$  = 25.7 Hz), 109.1 (d,  $J$  = 23.1 Hz). **HR-MS (APCI,  $m/z$ )**:  $[M+H]^+$  calculated for C<sub>21</sub>H<sub>14</sub>ClFN: 334.0799; found: 344.0795.

#### 5.16 6-Bromo-7-methyl-2,4-diphenylquinoline (3p; Scheme 3)

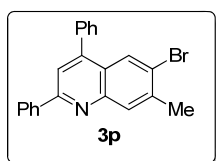

The title compound was prepared using the general procedure for the K<sup>t</sup>OBu catalyzed oxidative cycloisomerization.

Yield: 54.6 mg, 73%;  $R_f$  = 0.34 (05:95 = EtOAc/n-Hexane); Light yellow liquid; **FT-IR (neat)**: 3421, 3334, 3025, 2920, 2801, 2101, 1856, 1644, 1389, 1357, 1263, 1182, 1026, 945, 884, 865, 769  $\text{cm}^{-1}$ ; **<sup>1</sup>H NMR (400 MHz, CDCl<sub>3</sub>)**:  $\delta$ , 8.20 (d,  $J$  = 8.0 Hz, 2H), 8.06 (s, 1H), 7.81 (d,  $J$  = 8.0 Hz, 1H), 7.76 (s, 1H), 7.56 – 7.51 (6H), 7.47 (m, 1H), 7.31 (dd,  $J$  = 8.0, 1.5 Hz, 1H), 2.59 (s, 3H); **<sup>13</sup>C NMR (100 MHz, CDCl<sub>3</sub>)**:  $\delta$ , 156.9, 149.1, 148.9, 139.8, 139.8, 138.6, 129.6, 129.3, 129.2, 128.8, 128.6, 128.6, 128.4, 127.6, 125.3, 123.8, 118.6, 21.7; **HR-MS (ESI,  $m/z$ )**:  $[M+H]^+$  calculated for C<sub>22</sub>H<sub>17</sub>BrN: 374.0544; found: 374.0541.

### 5.17 8-Methoxy-6-methyl-2,4-diphenylquinoline (3q; Scheme 3)

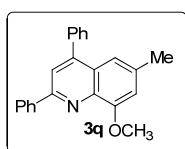

The title compound was prepared using the general procedure for the K<sup>t</sup>OBu catalyzed oxidative cycloisomerization.

Yield: 47 mg, 72%;  $R_f$  = 0.30 (05:95 = EtOAc/n-Hexane); Light yellow Solid; **mp** 150-152 °C; **FT-IR (neat)**: 3402, 2927, 2776, 2087, 1636, 1563, 1549, 1519, 1487, 1421, 1406, 1264, 1199, 1159, 1129, 1108, 902, 842, 764  $\text{cm}^{-1}$ ; **<sup>1</sup>H NMR (400 MHz, CDCl<sub>3</sub>)**:  $\delta$ , 8.03 (d,  $J$  = 8.0, 2H), 7.79 (s, 1H), 7.54 – 7.46 (m, 7H), 7.41 (s, 1H), 7.21(s, 1H), 6.91(s,1H), 4.10 (s, 3H), 2.44 (s, 3H); **<sup>13</sup>C NMR (100 MHz, CDCl<sub>3</sub>)**:  $\delta$ , 155.4, 154.8, 148.4, 139.8, 139.3, 138.9, 136.4, 129.5, 129.0, 128.7, 128.5, 128.2, 127.6, 126.8, 119.9, 116.4, 110.2, 56.2, 22.5; **HR-MS (ESI,  $m/z$ )**:  $[M+H]^+$  calculated for C<sub>23</sub>H<sub>20</sub>NO: 326.1545; found: 326.1549.

### 5.18 2,4-Diphenyl-10H-indeno[1,2-g]quinoline (3r; Scheme 3)

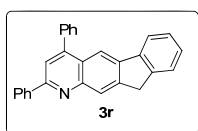

The title compound was prepared using the general procedure for the K<sup>t</sup>OBu catalyzed oxidative cycloisomerization.

Yield: 51.6 mg, 70%;  $R_f$  = 0.34 (05:95 = EtOAc/n-Hexane); Light yellow Solid; **mp** 200-202 °C; **FT-IR (neat)**: 3422, 3058, 2925, 2363, 2329, 1700, 1603, 1494, 1455, 1368, 1265, 1030, 766, 727  $\text{cm}^{-1}$ ; **<sup>1</sup>H NMR (400 MHz, CDCl<sub>3</sub>)**:  $\delta$ , 8.34 (s, 1H), 8.21 (d,  $J$  = 8.0 Hz, 3H), 7.81 (s, 1H), 7.78 (m, 1H), 7.58 (m, 8H), 7.45 (m, 1H), 7.34 (2H), 4.16 (s, 2H); **<sup>13</sup>C NMR (100**



**MHz, CDCl<sub>3</sub>):**  $\delta$ , 156.0, 149.1, 148.7, 145.2, 143.9, 141.0, 140.7, 139.8, 138.9, 129.7, 129.2, 128.8, 128.7, 128.4, 127.9, 127.5, 127.0, 125.7, 125.3, 125.3, 120.8, 119.0, 115.2, 36.6 ; **GC-MS (EI, *m/z*):**  $[M]^+$  calculated for C<sub>28</sub>H<sub>19</sub>N: 369.1517; found: 369.1518.

### 5.19 6-Methyl-2,4-di-*p*-tolylquinoline (5a; Scheme 4)

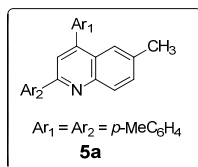

The title compound was prepared using the general procedure for the K<sup>t</sup>OBu catalyzed oxidative cycloisomerization.

Yield: 52 mg, 80%;  $R_f$  = 0.28 (05:95 = EtOAc/n-Hexane); Brown liquid; **FT-IR (neat):** 3449, 3024, 2920, 2092, 1637, 1353, 1114, 882, 823, 748 cm<sup>-1</sup>; **<sup>1</sup>H NMR (400 MHz, CDCl<sub>3</sub>):**  $\delta$ , 8.10 (d,  $J$  = 8.0 Hz, 1H), 8.06 (d,  $J$  = 8.0 Hz, 2H), 7.73 (s, 1H), 7.65 (s, 1H), 7.53 (dd,  $J$  = 12.0, 4 Hz, 1H), 7.44 (d,  $J$  = 8.0 Hz, 2H), 7.35 (d,  $J$  = 8.0 Hz, 2H), 7.31 (d,  $J$  = 8.0 Hz, 2H), 2.48 (s, 3H), 2.46 (s, 3H), 2.42 (s, 3H) ; **<sup>13</sup>C NMR (100 MHz, CDCl<sub>3</sub>):**  $\delta$ , 156.0, 148.4, 147.4, 139.1, 138.1, 137.0, 135.9, 135.8, 131.6, 129.7, 129.5, 129.5, 129.3, 127.3, 125.7, 124.4, 119.2, 21.8, 21.3, 21.3; **LR-MS (ESI, *m/z*):**  $[M+H]^+$  calculated for C<sub>24</sub>H<sub>22</sub>N: 324.2; found: 324.2.

### 5.20 2,4-Bis(4-chlorophenyl)-6-methylquinoline (5b; Scheme 4)

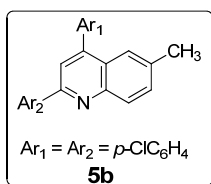

The title compound was prepared using the general procedure for the K<sup>t</sup>OBu catalyzed oxidative cycloisomerization.

Yield: 55.4 mg, 76%;  $R_f$  = 0.40 (20:80 = EtOAc/n-Hexane); White solid; **mp** 182-185 °C; **FT-IR (neat):** 3436, 2923, 2092, 1646, 1484, 1353, 1088, 1009, 823, 746 cm<sup>-1</sup>; **<sup>1</sup>H NMR (400 MHz, CDCl<sub>3</sub>):**  $\delta$ , 8.12 – 8.09 (3H), 7.68 (s, 1H), 7.58 – 7.52 (4H), 7.48 – 7.46 (4H), 2.47 (s, 3H); **<sup>13</sup>C NMR (100 MHz, CDCl<sub>3</sub>):**  $\delta$ , 154.6, 147.4, 147.3, 137.9, 136.8, 136.8, 135.5, 134.6, 132.1, 130.8, 129.9, 129.0, 128.9, 128.7, 125.5, 124.1, 118.8, 21.8; **GC-MS (EI, *m/z*):**  $[M]^+$  calculated for C<sub>22</sub>H<sub>15</sub>Cl<sub>2</sub>N: 363.0582; found: 363.0590.

### 5.21 2,4-Bis(4-bromophenyl)-6-methylquinoline (5c; Scheme 4)

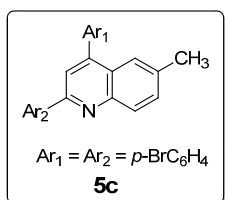

The title compound was prepared using the general procedure for the K<sup>t</sup>OBu catalyzed oxidative cycloisomerization.

Yield: 69.7 mg, 77%;  $R_f$  = 0.35 (20:80 = EtOAc/n-Hexane); White solid; **mp** 188-190 °C; **FT-IR (neat)**: 3385, 3059, 2930, 2092, 1627, 1530, 1486, 1399, 1263, 1138, 1071, 1024, 1009, 976, 929, 816  $\text{cm}^{-1}$ ; **<sup>1</sup>H NMR (400 MHz, CDCl<sub>3</sub>)**:  $\delta$ , 8.10 (d,  $J$  = 8.0 Hz, 1H), 8.05 (d,  $J$  = 12.0 Hz, 2H), 7.69 – 7.67 (m, 3H), 7.63 (d,  $J$  = 8.0 Hz, 2H), 7.58 – 7.56 (2H), 7.41 (d,  $J$  = 12.0 Hz, 2H), 2.47 (s, 3H); **<sup>13</sup>C NMR (100 MHz, CDCl<sub>3</sub>)**:  $\delta$ , 154.7, 147.4, 147.3, 138.4, 137.3, 136.8, 132.1, 131.9, 131.8, 131.1, 129.9, 128.9, 125.5, 124.1, 123.8, 122.8, 118.7, 21.8; **HR-MS (APCI,  $m/z$ )**:  $[M+H]^+$  calculated for C<sub>22</sub>H<sub>16</sub>Br<sub>2</sub>N: 451.9649; found: 451.9645.

### 5.22 6-Methyl-2,4-di(thiophen-2-yl)quinoline (5d; Scheme 4)

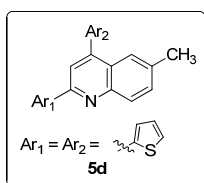

The title compound was prepared using the general procedure for the K<sup>t</sup>OBu catalyzed oxidative cycloisomerization.

Yield: 48 mg, 78%;  $R_f$  = 0.36 (05:95 = EtOAc/n-Hexane); Yellow solid; **mp** 145-148 °C; **FT-IR (neat)**: 3438, 3050, 2925, 2853, 2363, 1597, 1469, 1264, 1059, 779, 739  $\text{cm}^{-1}$ ; **<sup>1</sup>H NMR (400 MHz, CDCl<sub>3</sub>)**:  $\delta$ , 8.03 (d,  $J$  = 8.0 Hz, 1H), 7.94 (s, 1H), 7.79 (s, 1H), 7.72 (dd,  $J$  = 8.0, 4.0 Hz, 1H), 7.55 – 7.52 (2H), 7.44 (d,  $J$  = 8.0 Hz, 1H), 7.39 (d,  $J$  = 4.0 Hz, 1H), 7.24 (t,  $J$  = 4 Hz, 1H), 7.14 (dd,  $J$  = 8.0, 4.0 Hz, 1H), 2.49 (s, 3H); **<sup>13</sup>C NMR (100 MHz, CDCl<sub>3</sub>)**:  $\delta$ , 151.0, 147.4, 145.2, 140.7, 139.1, 136.5, 132.1, 129.5, 128.4, 128.3, 128.1, 127.8, 127.0, 125.6, 125.5, 124.3, 118.5, 21.8; **HR-MS (ESI,  $m/z$ )**:  $[M+H]^+$  calculated for C<sub>18</sub>H<sub>14</sub>NS<sub>2</sub>: 308.0568; found: 308.0562.

### 5.23 6-Methyl-2,4-di(naphthalen-1-yl)quinoline (5e; Scheme 4)

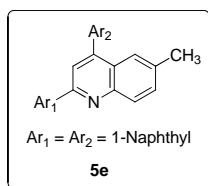

The title compound was prepared using the general procedure for the  $\text{K}^t\text{OBu}$  catalyzed oxidative cycloisomerization.

Yield: 64.2 mg, 81%;  $R_f = 0.30$  (10:90 = EtOAc/Hexane); White solid; **mp** 65-70 °C; **IR** (**neat**): 3355, 3419, 3110, 3053, 2769, 1927, 1623, 1589, 1562, 1508, 1477, 1349, 1292, 1143, 1112, 1087, 1017, 938, 906, 851, 827, 817, 775, 756, 699  $\text{cm}^{-1}$ ;  **$^1\text{H}$  NMR (400 MHz,  $\text{CDCl}_3$ )**:  $\delta$ , 8.36 (m, 1H), 8.25 (d,  $J = 8.0$  Hz, 1H), 8.01 – 7.91 (4H), 7.81 (d,  $J = 8.0$  Hz, 1H), 7.73 (s, 1H), 7.62 (d,  $J = 8.0$  Hz, 2H), 7.56 (m, 3H), 7.51 (m, 3H), 7.39 (t,  $J = 8.0$  Hz, 1H), 7.31 (s, 1H), 2.37 (s, 3H);  **$^{13}\text{C}$  NMR (100 MHz,  $\text{CDCl}_3$ )**:  $\delta$ , 158.0, 147.1, 146.8, 138.7, 136.7, 135.9, 134.1, 133.6, 132.1, 132.1, 131.4, 129.8, 129.1, 128.7, 128.4, 128.4, 127.9, 127.5, 126.8, 126.6, 126.5, 126.2, 126.1, 125.9, 125.8, 125.4, 125.3, 124.9, 124.7, 21.7; **GC-MS (EI,  $m/z$ )**:  $[\text{M}]^+$  calculated for  $\text{C}_{30}\text{H}_{21}\text{N}$ : 395.1674; found: 395.1656.

### 5.24 4,6-Dimethyl-2-phenylquinoline (5f; Scheme 4):<sup>8</sup>

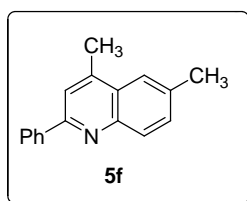

The title compound was prepared using the general procedure for the  $\text{K}^t\text{OBu}$  catalyzed oxidative cycloisomerization.

Yield: 34 mg, 73%;  $R_f = 0.33$  (05:95 = EtOAc/Hexane); Brown solid; **mp**. 145-147 °C; **IR** (**neat**): 3332, 3102, 3025, 1623, 1503, 1449, 1281, 972  $\text{cm}^{-1}$ ;  **$^1\text{H}$  NMR (400 MHz,  $\text{CDCl}_3$ )**:  $\delta$ , 8.18 – 8.11 (2H), 8.11 – 8.01 (m, 1H), 7.72 (s, 1H), 7.62 (s, 1H), 7.56 – 7.52 (2H), 7.51 – 7.45 (m, 1H), 7.44 – 7.42 (1H), 2.53 (s, 3H), 2.34 (s, 3H);  **$^{13}\text{C}$  NMR (100 MHz,  $\text{CDCl}_3$ )**:  $\delta$ , 156.0, 148.1, 139.9, 139.7, 138.8, 136.3, 129.5, 128.7, 128.2, 127.4, 124.7, 124.2, 118.6, 20.29, 20.26; **LR-MS (ESI,  $m/z$ )**:  $[\text{M}+\text{H}]^+$  calculated for  $\text{C}_{17}\text{H}_{16}\text{N}$ : 234.1; found: 234.2.

### 5.25 4-Cyclohexyl-6-methyl-2-phenylquinoline (5g; Scheme 4)

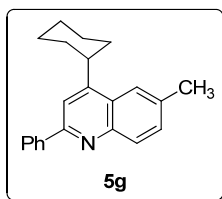

The title compound was prepared using the general procedure for the K<sup>t</sup>OBu catalyzed oxidative cycloisomerization.

Yield: 42.4 mg, 71%;  $R_f$  = 0.33 (05:95 = EtOAc/n-Hexane); Light yellow solid; **mp.** 130-132 °C; **FT-IR (neat):** 3433, 2924, 2503, 2086, 1637, 1450, 1127, 1034, 901, 824, 769, 744 cm<sup>-1</sup>; **<sup>1</sup>H NMR (400 MHz CDCl<sub>3</sub>):**  $\delta$ , 8.11 (d,  $J$  = 8.0 Hz, 2H), 8.07 (d,  $J$  = 8.0 Hz, 1H), 7.81 (s, 1H), 7.70 (s, 1H), 7.53 – 7.48 (3H), 7.43 (m, 1H), 3.34 (m, 1H), 2.57 (s, 3H), 2.07 – 2.04 (2H), 1.96 – 1.94 (2H), 1.66 – 1.57 (6H); **<sup>13</sup>C NMR (100 MHz, CDCl<sub>3</sub>):**  $\delta$ , 156.5, 153.2, 147.1, 140.4, 135.6, 131.2, 130.4, 128.9, 128.7, 127.5, 125.8, 121.7, 115.5, 38.9, 33.7, 29.7, 26.9, 26.7, 26.3, 22.1; **GC-MS (EI,  $m/z$ ):**  $[M]^+$  calculated for C<sub>22</sub>H<sub>23</sub>N: 301.1830; found: 301.1817.

### 5.26 6-Methyl-2-phenylquinoline (5h; Scheme 4)

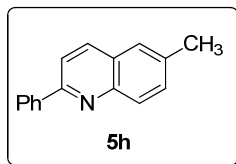

The title compound was prepared using the general procedure for the K<sup>t</sup>OBu catalyzed oxidative cycloisomerization.

Yield: 30.7 mg, 70%;  $R_f$  = 0.36 (05:95 = EtOAc/n-Hexane); Yellow solid; **mp** 65-70 °C; **FT-IR (neat):** 3430, 2905, 2421, 2105, 1638, 1598, 1557, 1493, 1375, 1322, 1020, 934, 831, 781, 767 cm<sup>-1</sup>; **<sup>1</sup>H NMR (400 MHz, CDCl<sub>3</sub>):**  $\delta$ , 8.15 – 8.11 (3H), 8.05 (d,  $J$  = 8.0 Hz, 1H), 7.83 (d,  $J$  = 12.0 Hz, 1H), 7.58 (s, 1H), 7.56 – 7.53 (1H), 7.51 – 7.49 (2H), 7.45 – 7.42 (m, 1H), 2.54 (s, 3H); **<sup>13</sup>C NMR (100 MHz, CDCl<sub>3</sub>):**  $\delta$ , 156.5, 146.9, 139.8, 136.1, 136.1, 131.9, 129.4, 129.1, 128.8, 127.5, 127.2, 126.3, 119.0, 21.6; **HR-MS (ESI,  $m/z$ ):**  $[M+H]^+$  calculated for C<sub>16</sub>H<sub>14</sub>N: 220.1126; found: 220.1146.

### 5.27 6-Methylquinoline (5i; Scheme 4)

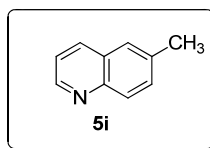

The title compound was prepared using the general procedure for the K<sup>t</sup>OBu catalyzed oxidative cycloisomerization.

Yield: 17.5 mg, 61%;  $R_f$  = 0.24 (05:95 = EtOAc/n-Hexane); Light yellow liquid; **FT-IR (neat)**: 3435, 2923, 2092, 1646, 1484, 1493, 1254, 1013, 812, 750, 706  $\text{cm}^{-1}$ ; **<sup>1</sup>H NMR (400 MHz, CDCl<sub>3</sub>)**:  $\delta$ , 8.69 (s, 1H), 7.89 – 7.81 (2H), 7.34 (m, 2H), 7.12 (s, 1H), 2.32 (s, 3H); **<sup>13</sup>C NMR (100 MHz, CDCl<sub>3</sub>)**:  $\delta$ , 149.4, 146.8, 136.1, 135.2, 131.6, 129.0, 128.2, 126.5, 120.9, 21.41; **LR-MS (ESI,  $m/z$ )**:  $[M+H]^+$  calculated for C<sub>10</sub>H<sub>10</sub>N: 144.1; found: 144.2.

### 5.28 2-methyl-6-phenyl-7,8-dihydrobenzo[k]phenanthridine (5j; Scheme 4)

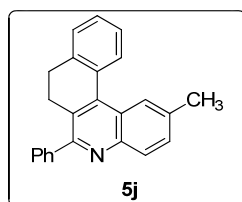

The title compound was prepared using the general procedure for the K<sup>t</sup>OBu catalyzed oxidative cycloisomerization.

Yield: 42 mg, 65%;  $R_f$  = 0.38 (05:90 = EtOAc/n-Hexane); Light yellow solid; **mp** 138-140 °C **FT-IR (neat)**: 3437, 2918, 2601, 2087, 1647, 1493, 1254, 1013, 812, 750  $\text{cm}^{-1}$ ; **<sup>1</sup>H NMR (400 MHz, CDCl<sub>3</sub>)**:  $\delta$ , 8.58 (d,  $J$  = 8.0 Hz, 1H), 8.06 (d,  $J$  = 8.0 Hz, 1H), 7.56 – 7.49 (3H), 7.46 (dd,  $J$  = 8.0, 4.0 Hz, 1H), 7.42 (t,  $J$  = 8.0 Hz, 1H), 7.34 (1H), 7.30 (m, 2H), 7.22 (d,  $J$  = 8.0 Hz, 1H), 7.14 (s, 1H), 2.86 – 2.84 (m, 2H), 2.82 – 2.79 (m, 2H), 2.39 (s, 3H); **<sup>13</sup>C NMR (100 MHz, CDCl<sub>3</sub>)**:  $\delta$ , 152.3, 145.8, 144.7, 139.2, 137.2, 135.8, 135.2, 130.7, 129.5, 129.4, 129.4, 128.5, 128.1, 127.8, 127.6, 127.2, 127.2, 126.2, 124.8, 28.3, 26.5, 21.8; **GC-MS (EI,  $m/z$ )**:  $[M]^+$  calculated for C<sub>24</sub>H<sub>19</sub>N: 321.1517; found: 321.1506.

### 5.29 3,6-Dimethyl-2,4-diphenylquinoline (5k; Scheme 4)

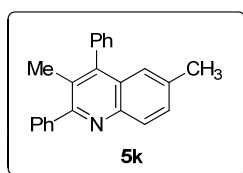

The title compound was prepared using the general procedure for the K<sup>t</sup>OBu catalyzed oxidative cycloisomerization.

Yield: 45.8 mg, 74%;  $R_f$  = 0.43 (05:95 = EtOAc/n-Hexane); Dark brown liquid; **FT-IR (neat)**: 3338, 2925, 2855, 2364, 2334, 1717, 1496, 1458, 1303, 1077, 911, 700  $\text{cm}^{-1}$ ; **<sup>1</sup>H NMR (400 MHz, CDCl<sub>3</sub>)**:  $\delta$ , 8.18 – 8.16 (m, 2H), 8.01 (m, 1H), 7.72 – 7.62 (1H), 7.55 (s, 1H), 7.53 – 7.49 (5H), 7.45 – 7.44 (2H), 7.43 (m, 1H), 2.44 (s, 3H), 2.33 (s, 3H); **<sup>13</sup>C NMR (100 MHz, CDCl<sub>3</sub>)**:  $\delta$ , 156.0, 148.0, 139.7, 138.8, 136.3, 129.5, 129.4, 129.1, 128.6, 128.5, 128.8, 128.5, 128.3, 127.5, 124.7, 124.2, 118.7, 20.3, 20.2 ; **LR-MS (ESI,  $m/z$ )**:  $[M+H]^+$  calculated for C<sub>23</sub>H<sub>20</sub>N: 310.1; found: 310.2.

### 5.30 (E)-6-Methyl-2-styrylquinoline (5l; Scheme 4)<sup>11</sup>

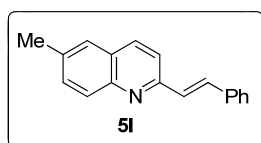

The title compound was prepared using the general procedure for the K<sup>t</sup>OBu catalyzed oxidative cycloisomerization.

Yield: 36.8 mg, 75%;  $R_f$  = 0.26 (10:90 = EtOAc/n-Hexane); white solid; **mp** 130-132 °C; **FT-IR (neat)**: 3365, 2930, 2105, 1637, 1493, 1441, 1121, 961, 926, 828, 746  $\text{cm}^{-1}$ ; **<sup>1</sup>H NMR (400 MHz, CDCl<sub>3</sub>)**:  $\delta$ , 7.97 (d,  $J$  = 8.0 Hz, 2H), 7.65 – 7.57 (4H), 7.51 (d,  $J$  = 8.0 Hz, 2H), 7.38 (3H), 7.30 (t,  $J$  = 8.0, 4.0 Hz, 1H), 2.50 (s, 3H) ; **<sup>13</sup>C NMR (100 MHz, CDCl<sub>3</sub>)**:  $\delta$ , 155.1, 146.8, 136.6, 136.1, 135.6, 133.8, 132.0, 129.2, 128.9, 128.8, 128.5, 127.4, 127.2, 126.5, 119.2, 21.6; **LR-MS (ESI,  $m/z$ )**:  $[M+H]^+$  calculated for C<sub>18</sub>H<sub>16</sub>N: 246.1; found: 246.2.

### 5.31 (E)-6-Chloro-2-(4-methylstyryl)quinoline (5m; Scheme 4)<sup>11</sup>

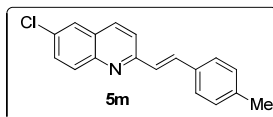

The title compound was prepared using the general procedure for the K<sup>t</sup>OBu catalyzed oxidative cycloisomerization.

Yield: 40.4 mg, 72%;  $R_f$  = 0.31 (05:95 = EtOAc/n-Hexane); white solid; **mp** 140-145 °C ; **FT-IR (neat)**: 3365, 2925, 2098, 1631, 1485, 1436, 1101, 957, 916, 813, 741  $\text{cm}^{-1}$ ; **<sup>1</sup>H NMR (400 MHz, CDCl<sub>3</sub>)**:  $\delta$ , 8.10 (d,  $J$  = 8.4 Hz, 1H), 8.01 (d,  $J$  = 8.6 Hz, 1H), 7.71 (d,  $J$  = 8.1 Hz, 1H), 7.64 (d,  $J$  = 16.3 Hz, 1H), 7.57 (d,  $J$  = 8.6 Hz, 1H), 7.52 (d,  $J$  = 8.0 Hz, 2H), 7.44 (t,  $J$  = 7.8 Hz, 1H), 7.36 (d,  $J$  = 16.3 Hz, 1H), 7.18 (d,  $J$  = 7.9 Hz, 2H), 2.35 (s, 3H); **<sup>13</sup>C NMR (100**

**MHz, CDCl<sub>3</sub>):**  $\delta$ , 156.21, 148.31, 138.73, 136.26, 134.45, 133.80, 129.71, 129.58, 129.19, 128.08, 127.55, 127.31, 127.27, 126.06, 119.23, 21.42; **LR-MS (ESI, m/z):** [M+H]<sup>+</sup> calculated for C<sub>18</sub>H<sub>15</sub>ClN: 280.1; found: 280.1.

## 6. References:

- 1) Nallagonda, R.; Mohammad, R.; Ghorai, P. *J. Org. Chem.* **2014**, 79, 2934.
- 2) Nallagonda, R.; Mohammad, R.; Ghorai, P. *Org. Lett.* **2014**, 16, 4786.
- 3) Du, J.; Yoon, T. P. *J. Am. Chem. Soc.* **2009**, 131, 14604.
- 4) Lannou, M.-I.; Héliou, F.; Namy, J.-L. *Synlett* **2007**, 17, 2707.
- 5) Xu, W.-Z.; Huang, Z.-T.; Zheng, Q.-Y. *J. Org. Chem.* **2008**, 73, 5606.
- 6) Yin, Y.; Zhao, G. *J. Fluorine. Chem.* **2007**, 128, 40.
- 7) Zhang, X.; Liu, B.; Shu, X.; Gao, Y.; Lv, H.; Zhu, J.; *J. Org. Chem.* **2012**, 77, 501.
- 8) Wang, Y.; Chen, C.; Peng, J.; Li, M. *Angew. Chem. Int. Ed.* **2013**, 52, 5323 .
- 9) Sarma, R.; Prajapati, D. *Synlett.* **2008**, 19, 3001.
- 10) Korivi, R. V.; Cheng, C.-H. *J. Org. Chem.* **2006**, 71, 7079.
- 11) Yan, Y.; Xu, K.; Fang, Y.; Wang, Z. *J. Org. Chem.* **2011**, 76, 6849.
